# Supplementary material for: Characterization of the Rosa roxburghii Tratt transcriptome and analysis of MYB genes
Source: PLoS One. 2019 Mar 12;14(3):e0203014. doi: 10.1371/journal.pone.0203014 (PMC6414006; doi:10.1371/journal.pone.0203014)
Supplement: S7 Table — FPKM means fragments per kilobase of transcript per million mapped reads. (XLSX) [file pone.0203014.s007.xlsx]

## Sheet: Sheet1
Gene Id	FPKM					Description
	Leaf	Stem	Flower	Mature	Young Fruit
				fruit
DN147278_c2_g2	0.59	0.24	0.5	0.16	0.03	MYB59 [Fragaria vesca subsp. vesca]
DN142862_c4_g4	11.3	8.73	4.3	0.2	1.29	MYB11 [Fragaria x ananassa]
DN142862_c0_g1	0.47	1.75	0.32	84.33	26.44	MYB-related protein MYB4 [Prunus persica]
DN143039_c2_g1	0	0.53	0	0.05	0.15	MYB3-like [Prunus mume]
DN109626_c0_g1	0.02	0.29	0.02	0.44	0.02	MYB10 V1-3 [Prunus avium]
DN138607_c0_g1	2.27	28.93	2.64	0.46	12.49	MYB-related protein MYB4 [Morus notabilis]
DN127958vc0_g1	10.87	13.42	1.88	0.43	2.21	transcriptional activator MYB [Fragaria vesca subsp. vesca]
DN146459_c2_g12	0.85	0	0	0	0	MYB82-like [Fragaria vesca subsp. vesca]
DN146332_c2_g2	14.38	10.14	16.78	16.98	14.97	DIVARICATA [Fragaria vesca subsp. vesca]
DN147128_c3_g4	0.87	6.4	12.65	30.65	5.4	MYB3 [Prunus mume]
DN127953_c0_g1	0.71	9.7	0.97	2.46	2.54	MYB-like protein AA [Fragaria vesca subsp. vesca]
DN148161_c1_g2	5.06	7.58	20.61	0.92	1.66	MYB-related protein 3R-1 [Fragaria vesca subsp. vesca]
DN133642_c0_g1	124.88	32.04	27.96	12.66	58.26	MYB1R1 [Malus domestica]
DN145224_c1_g2	35.3	22.89	5.48	7.49	29.49	MYB-like protein P [Fragaria vesca subsp. vesca]
DN132443 c0_g1	4.86	12.08	4.08	9.93	29.72	MYB family APL [Prunus persica]
DN144924_c2_g8	0	0	0.31	0	0	MYB-like protein X [Malus domestica]
DN128191_c0_g1	0.3	1	5.08	2.27	0.35	MYB-like protein J [Fragaria vesca subsp. vesca]
DN99221_c0_g1	28.88	34.04	16.53	14.19	48.91	MYB44-like [Fragaria vesca subsp. vesca]
DN146459_c2_g7	1.19	3.75	5.38	0.54	3.73	MYB108 [Fragaria vesca subsp. vesca]
DN146459_c2_g5	0.78	1.08	1.09	0.02	0.02	MYB82-like [Fragaria vesca subsp. vesca]
DN138619_c0_g3	5.21	5.07	1.16	1.45	2.83	MYB4 [Eriobotrya japonica]
DN134104_c1_g3	0	0.05	0.03	0.03	0.53	SANT/MYB domain [Macleaya cordata]
DN144159_c2_g1	63.36	38.01	60.4	33.43	38.54	MYB-like protein X [Malus domestica]
DN146459_c2_g4	0	0	0.86	0	0	cold- and ABA-responsive R2R3 MYB 5 [Cichorium intybus]
DN145009_c3_g1	0.13	1.03	0.93	0.46	0.12	MYB protein-like isoform X1 [Gossypium hirsutum]
DN144656_c3_g2	26.1	60.02	29.09	14.92	29.26	MYB-like protein X isoform X2 [Pyrus x bretschneideri]
DN143393_c4_g2	1.63	5.81	2.19	1.56	5.25	MYB-like protein Q
DN142862_c4_g3	1.32	5.31	1.61	0	0.57	MYB46 [Fragaria vesca subsp. vesca]
DN147282_c0_g1	4.46	4.33	4.81	5.08	4.1	GAMYB [Fragaria vesca subsp. vesca]
DN234092_c0_g1	0	0.14	0	0.81	1	R2R3-MYB protein [Rehmannia glutinosa]
DN125895_c0_g1	0	0	0	0.02	0.3	MYB-related protein 305-like [Fragaria vesca subsp. vesca]
DN144228_c3_g1	43.67	37.66	32.69	60.24	57.04	MYB3R-3 [Prunus persica]
DN142101_c1_g3	0	0	0	0	0	MYB family APL isoform X1 [Fragaria vesca subsp. vesca]
DN145829_c0_g2	158.56	240.58	660.65	3	39.8	MYB R2R3-like protein [Populus tremuloides]
DN143003_c0_g1	0.62	0.19	0.15	0	0	MYB-related protein P [Aegilops tauschii]
DN144669_c3_g6	0	0.02	0	0.07	0	MYB-related protein 308-like [Pyrus x bretschneideri]
DN129697_c0_g1	0.24	0.18	0.05	0	0.1	MYB96
DN145308_c4_g2	0	0.11	0	0	0.24	MYB domain protein 121 [Theobroma cacao]
DN143480_c3_g1	7.95	7.79	8.08	9.78	11.87	MYB family PHL7 isoform X1 [Prunus persica]
DN94605_c0_g1	0.01	0.06	0.04	0.01	0.01	transcriptional activator MYB-like [Malus domestica]
DN147056_c0_g1	1.06	5.64	16.07	5.29	5	MYB-related protein MYB4 [Prunus persica]
DN138619_c0_g4	0.05	0.18	0.07	0.18	0.28	MYB-related protein 308-like [Malus domestica]
DN142862_c4_g2	0.41	0.08	1.27	0	0.03	transcription repressor MYB5-like [Malus domestica]
DN137108_c0_g1	0.26	4.58	0.24	0.04	0.2	MYB domain protein 15
DN142101_c1_g2	11.23	8.39	28.3	4.56	4.14	MYB family APL isoform X1 [Fragaria vesca subsp. vesca]
DN143366_c4_g3	61.83	13.13	1.43	0.21	0.98	MYB-like protein J [Malus domestica]
DN124843_c0_g1	0.11	1.35	0.1	0.27	0.79	MYB28-like [Fragaria vesca subsp. vesca]
DN146459_c2_g9	9.31	0.36	15.33	0	0.03	MYB82-like [Fragaria vesca subsp. vesca]
DN145149_c1_g6	0	0	0	0	0	MYB-related protein 306-like [Fragaria vesca subsp. vesca]
DN149746_c2_g4	2.67	2.39	2.95	1.59	3.94	MYB36-like [Ananas comosus]
DN145225_c1_g1	6.09	3.55	7.49	2.55	3.28	MYB family [Populus tomentosa]
DN146048_c0_g6	0.3	0.78	0.55	1.42	1.54	MYB-related protein 306-like [Pyrus x bretschneideri]
DN143393_c4_g1	2.39	5.18	2.31	3.34	2.88	MYB-related protein 315-like [Fragaria vesca subsp. vesca]
DN143733_c1_g1	8.37	8.48	9.49	19.74	11.55	putative MYB [Rosa rugosa]
DN148732_c1_g1	25.94	21.29	26.04	5.81	6.92	MYB1R1 [Fragaria vesca subsp. vesca]
DN138451_c0_g1	11.47	8.34	14.05	9.79	24.62	MYB-related protein 308-like [Fragaria vesca subsp. vesca]
DN130043_c0_g1	0.12	2.85	2.78	1.77	2.7	MYB family APL [Fragaria vesca subsp. vesca]
DN70434_c0_g1	0.13	1.07	4.14	0	0.53	MYB-like protein Q [Fragaria vesca subsp. vesca]
DN145308_c4_g3	26.6	10	26.38	0.54	1.6	putative MYB [Rosa rugosa]
DN146048_c0_g4	4.99	6.59	5.04	5.48	6.87	MYB35-like [Pyrus x bretschneideri]
DN145149_c1_g1	0.67	1.53	1.01	3.09	4.34	MYB-related protein 306-like [Fragaria vesca subsp. vesca]
DN147741_c0_g1	0.03	0.09	0	0.12	0.14	MYB63 [Prunus persica]
DN133537_c0_g1	0	0	0	0.17	0	MYB-like protein X [Bombyx mori]
DN143339_c4_g1	3.97	7.21	10.39	11.1	8.05	putative MYB [Rosa hybrid cultivar]
DN55106 c0_g1	0	0.45	0.09	0	0.09	WER-like [Fragaria vesca subsp. vesca]
DN148254_c1_g2	0	1.8	0.91	0.01	0.25	MYB21 [Fragaria vesca subsp. vesca]
DN279740_c0_g1	0	0.12	0	0.06	0.34	MYB108-like [Fragaria vesca subsp. vesca]
DN149499_c0_g2	1.91	5.13	1.79	2.98	4.74	MYB48-like isoform X2 [Pyrus x bretschneideri]
DN191623_c0_g1	0.14	0	0.16	0	0	MYB [Humulus lupulus]
DN145308_c4_g7	1.12	1.47	0.59	3.28	2.24	MYB12b protein [Malus hybrid cultivar]
DN149700_c2_g3	6.24	2.48	3.16	1.09	0.66	MYB-like ETC3 [Fragaria vesca subsp. vesca]
DN145308_c4_g5	0.37	0.37	0.67	1.56	0.52	WER-like [Fragaria vesca subsp. vesca]
DN139053_c0_g1	17.29	18.8	17.77	28.35	26.43	MYB family APL isoform X2 [Prunus mume]
DN131966_c0_g1	3.82	6.42	5.79	7.96	6.3	MYB-related protein 315 [Fragaria vesca subsp. vesca]
DN143182_c1_g11	2.53	1.56	1.02	0.14	0.21	MYB82-like [Fragaria vesca subsp. vesca]
DN128440_c0_g1	0	0.23	0	0.01	0.39	MYB36-like [Prunus mume]
DN144022_c3_g4	1.03	7.81	1.82	41	51.01	MYB-related protein 308 isoform X2 [Prunus persica]
DN144669_c3_g3	1.94	27.09	5.77	0.11	4.64	MYB-related protein 330 [Prunus persica]
DN149346_c2_g2	2.57	1.38	1.04	3.08	0.73	MYB family APL [Morus notabilis]
DN149295_c1_g7	0.07	1.11	0.03	0.05	0.14	MYB-related protein 315 [Fragaria vesca subsp. vesca]
DN146459_c2_g8	4.28	0.14	6.63	0	0.02	MYB82-like [Fragaria vesca subsp. vesca]
DN146459_c2_g1	13.6	16.25	49.2	0.31	26.14	MYB82-like [Fragaria vesca subsp. vesca]
DN148549_c3_g4	4.55	5.78	11.72	0.22	11.1	MYB82-like [Fragaria vesca subsp. vesca]
DN142723_c6_g4	12.17	13.47	13	12.7	12.57	putative MYB [Rosa hybrid cultivar]
DN148711_c6_g3	0.69	2.43	1.25	0.38	1.11	MYB-like protein Q isoform X1 [Fragaria vesca subsp. vesca]
DN146053_c2_g1	0.31	8.04	0.24	0.36	22.3	MYB-related protein Hv1 [Fragaria vesca subsp. vesca]
DN145308_c4_g6	10.12	9.03	4.31	1.59	3.57	MYB114-like [Prunus mume]
DN146463_c1_g1	12.43	15.05	11.06	17.38	38.64	MYB family EFM [Prunus persica]
DN149725_c2_g2	2.07	0.18	0.33	0.09	0.05	MYB-related
DN134136_c0_g1	0.1	0.12	0.15	0.03	0.05	MYB-related protein 330-like [Prunus mume]
DN146474_c3_g1	7.79	13.14	11.73	8.94	6.51	MYB family PHL6 [Prunus persica]
DN141656_c0_g1	0.03	1.05	0.99	0.05	3.04	MYB21 [Prunus mume]
DN111034_c0_g1	39.68	75.95	32.88	58.88	105.19	MYB12
DN145863_c0_g1	1.68	1.05	1.54	3.63	0.49	MYB-related protein 1-like [Pyrus x bretschneideri]
DN58257_c0_g1	0.25	0.72	2.79	0	0	MYB-like protein J [Erythranthe guttata]
DN6351_c0_g1	0.02	0.84	0.18	0.07	0.08	MYB-related protein 315 [Prunus persica]
DN149070_c1_g2	0.15	0.82	4.16	0	0.14	MYB10
DN142694_c0_g3	7.51	6.38	2.62	0.19	3.47	MYB-related protein 308-like [Pyrus x bretschneideri]
DN146459_c2_g11	0	1.08	0.3	0	0	MYB82-like [Fragaria vesca subsp. vesca]
DN141656_c0_g2	0	0	0	0	0.44	putative MYB [Rosa rugosa]
DN143182_c1_g10	0.11	0.27	0.1	0.15	0.29	MYB-related protein 306-like [Raphanus sativus]
DN129876_c0_g1	4.24	6.29	2.26	5.11	13.25	MYB family PHL8 [Prunus persica]
DN146433_c2_g3	9.89	28.28	16.16	0.09	5.05	MYB46 [Fragaria vesca subsp. vesca]
DN140462_c0_g1	0.92	0.67	0.46	0.53	1	MYB9 [Eriobotrya japonica]
DN146126_c4_g1	52.3	84.08	53.11	12.25	89.67	MYB-like ETC1 [Populus euphratica]
DN149746_c2_g7	1.91	3.28	14.76	1.46	3.06	MYB36-like [Prunus mume]
DN140462_c0_g3	0	0.02	0	0.07	0.05	MYB9 [Eriobotrya japonica]
DN267156_c0_g1	0	0.25	0.03	0.03	0.1	MYB39 [Fragaria vesca subsp. vesca]
DN142723_c6_g2	11.98	19.44	22.17	15.23	14.23	MYB [Rosa rugosa]
DN66535_c0_g1	6.61	14.93	32.97	14.09	19.6	MYB92 [Malus domestica]
DN270454_c0_g1	0	0.02	0.08	0	0	MYB-like family protein
DN144924_c2_g5	42.89	39.94	36.24	11.59	13.34	MYB-like family protein
DN135152_c0_g1	0.25	0.96	0.13	1.11	2.05	MYB family PHL5 isoform X2 [Prunus persica]
DN147056_c0_g3	0	0	0	0	0.17	MYB8 [Eriobotrya japonica]
DN144339_c1_g4	4.64	10.44	11.18	31.21	27.49	transcription repressor MYB6-like [Pyrus x bretschneideri]
DN138638_c0_g1	0.04	1.63	0.62	0.09	0.01	MYB-related protein 305-like [Malus domestica]
DN143182_c1_g1	4.91	5.82	18.61	0.28	12.81	MYB13
DN144669_c3_g5	0.22	0.75	0.06	1.06	6.35	MYB-related protein 308-like [Pyrus x bretschneideri]
DN188294_c0_g1	0	0.09	0.26	0	0	MYB-related protein MYB4 [Fragaria vesca subsp. vesca]
DN121791_c0_g1	0	1.19	0	0	0.05	MYB-related protein MYB4-like [Prunus mume]
DN144568_c0_g4	3.27	1.2	8.67	0.31	0.1	MYB82-like [Fragaria vesca subsp. vesca]
DN147056_c0_g2	0	0	1.31	0	0	MYB-related protein MYB4 [Eucalyptus grandis]
DN274153_c0_g1	0.67	0	0.28	0	0	MYB1R1 [Fragaria vesca subsp. vesca]
DN146443_c1_g4	0.34	1.27	0.49	0.58	6.22	MYB-related protein 2 isoform X1 [Prunus persica]
DN144669_c3_g1	0	0.1	7.64	0	0	MYB-related protein 306-like [Prunus persica]
DN149700_c2_g2	2.92	3.23	3.45	2.43	3.62	MYB-like ETC1 isoform X2 [Cajanus cajan]
DN140431_c0_g1	0	0.15	0.1	0.1	0.57	WER-like [Prunus mume]
DN146459_c0_g1	18.26	6.6	6.01	0.01	0.07	MYB-related protein 330 [Fragaria vesca subsp. vesca]
DN143182_c2_g1	0	0	0	0	0	MYB90 [Eucalyptus grandis]
DN145308_c4_g1	13.13	8.57	9.35	4.3	9.13	transcription repressor MYB5 [Fragaria vesca subsp. vesca]
DN30159_c0_g1	0.11	0.26	0.05	0.19	0.33	MYB10 V1-1/V2 [Prunus avium]
DN138619_c0_g2	0.42	1.88	11.73	0.02	0.59	MYB3 isoform X1 [Vitis vinifera]
DN125764_c0_g1	0	0	0	0.54	0	MYB-like protein X [Helicoverpa armigera]
DN136168_c0_g1	59.36	23.36	21.38	6.43	9.22	MYB-related protein 308 [Ricinus communis]
DN143003_c4_g3	4.24	0.93	4.53	0.23	0.56	putative MYB family At1g14600 [Fragaria vesca subsp. vesca]
DN143137_c2_g1	7.66	26.34	25.21	2.61	17.73	MYB family EFM isoform X2 [Prunus persica]
DN138619_c0_g1	0.45	1.8	3.45	1.22	4.46	MYB108-like [Fragaria vesca subsp. vesca]
DN146326_c1_g5	0	0.24	0.59	0	0	MYBR domain class [Malus domestica]
DN143203_c0_g1	27.21	96.86	18.3	17.8	31.69	MYB44-like [Fragaria vesca subsp. vesca]
DN146415 c3_g1	15.04	10.85	1.16	2.9	5.17	MYB-related protein MYB4-like [Fragaria vesca subsp. vesca]
DN127588_c0_g1	0.83	2.24	2.8	0.44	4.79	MYB family EFM [Prunus persica]
DN148549 c3_g2	1.25	0	0.42	0	0	MYB82-like [Fragaria vesca subsp. vesca]
DN146048_c0_g2	1.71	9.02	8.41	14.42	7.8	MYB1 [Prunus persica]
DN134407_c0_g1	0.36	0.77	0.2	0.18	0.39	MYB-like ETC3 [Fragaria vesca subsp. vesca]
DN141656_c0_g3	0	0	0	0	0	trichome differentiation protein GL1-like [Fragaria vesca subsp. vesca]
DN145021_c0_g7	7.64	25.31	8.8	1.55	9.52	MYB86-like [Prunus mume]
DN148048_c1_g1	0	0.05	0.2	0.22	0.29	MYB7 [Eriobotrya japonica]
DN145308_c5_g1	0	1.49	0	0	0.37	MYB111 protein
DN144626_c1_g2	29.94	7.57	5.93	0.34	1.12	MYB-related protein 306-like [Fragaria vesca subsp. vesca]
DN144174_c0_g4	2.43	6.76	2.77	5.46	5.81	MYB-like ETC3 [Fragaria vesca subsp. vesca]
DN145802_c2_g12	16.96	0.47	2.23	0.05	0.46	MYB114-like [Glycine max]
DN138288_c0_g2	0	0	0.01	0	0.12	MYB-related protein MYB4-like [Nicotiana sylvestris]
DN144626_c4_g1	0	0	0.3	0	0	MYB-related protein 306-like [Fragaria vesca subsp. vesca]
DN145164_c1_g1	21.36	7.9	6.6	3.23	4.47	MYB family EFM [Prunus persica]
DN147278_c5_g2	2.13	4.4	2.51	0.97	3.53	MYB114-like [Fragaria vesca subsp. vesca]
DN17982_c0_g1	0.73	0.38	0.74	0.19	0.2	MYB51-like [Malus domestica]
DN145308_c1_g1	9.73	23.73	5.38	2.58	13.45	MYB86 [Fragaria vesca subsp. vesca]
DN147925_c5_g4	0.06	0.07	13.68	0.02	0	MYB90-like [Fragaria vesca subsp. vesca]
DN28565_c0_g1	0.15	0	0.07	0	0	MYB-like protein K [Camponotus floridanus]
DN148048_c1_g5	0	0.33	0.78	0.03	0.4	MYB24 [Malus domestica]
DN144824_c3_g1	7.5	39.42	7.5	1.18	20.95	MYB44-like [Fragaria vesca subsp. vesca]
DN197272_c0_g1	0	0	0	0	0.36	MYB-related protein 306-like [Fragaria vesca subsp. vesca]
DN146011_c1_g1	23.76	18.3	11.36	13.05	27.71	MYB [Rosa hybrid cultivar]
