# Supplementary material for: Characterization of the Rosa roxburghii Tratt transcriptome and analysis of MYB genes
Source: PLoS One. 2019 Mar 12;14(3):e0203014. doi: 10.1371/journal.pone.0203014 (PMC6414006; doi:10.1371/journal.pone.0203014)
Supplement: S8 Table — (XLSX) [file pone.0203014.s008.xlsx]

## Sheet: Sheet1
Tissues	Gene Id	The expressed value in different tissue					Types of MYB superfamily
		Leaf	Stem	Flower	Young fruit	Mature fruit
Leaf	DN133642_c0_g1	124.88	32.04	27.96	12.66	58.26	R1 MYB
	DN143366_c4_g3	61.83	13.13	1.43	0.21	0.98	R1 MYB
	DN136168_c0_g1	59.36	23.36	21.38	6.43	9.22	R2R3 MYB
	DN144626_c1_g2	29.94	7.57	5.93	0.34	1.12	4R MYB
	DN145164_c1_g1	21.36	7.9	6.6	3.23	4.47	atypical
	DN146459_c0_g1	18.26	6.6	6.01	0.01	0.07	R2R3 MYB
	DN145802_c2_g12	16.96	0.47	2.23	0.05	0.46	atypical
	DN149725_c2_g2	2.07	0.18	0.33	0.09	0.05	atypical
	DN148549_c3_g2	1.25	0	0.42	0	0	R2R3 MYB
	DN146459_c2_g12	0.85	0	0	0	0	R2R3 MYB
	DN274153_c0_g1	0.67	0	0.28	0	0	R1 MYB
	DN143003_c0_g1	0.62	0.19	0.15	0	0	R2R3 MYB
	DN28565_c0_g1	0.15	0	0.07	0	0	atypical
stem	DN143203_c0_g1	27.21	96.86	18.3	17.8	31.69	R1 MYB
	DN144656_c3_g2	26.1	60.02	29.09	14.92	29.26	atypical
	DN138607_c0_g1	2.27	28.93	2.64	0.46	12.49	R2R3 MYB
	DN144669_c3_g3	1.94	27.09	5.77	0.11	4.64	R2R3 MYB
	DN145021_c0_g7	7.64	25.31	8.8	1.55	9.52	R2R3 MYB
	DN127953_c0_g1	0.71	9.7	0.97	2.46	2.54	R1 MYB
	DN142862_c4_g3	1.32	5.31	1.61	0	0.57	R2R3 MYB
	DN137108_c0_g1	0.26	4.58	0.24	0.04	0.2	atypical
	DN138638_c0_g1	0.04	1.63	0.62	0.09	0.01	R2R3 MYB
	DN145308_c5_g1	0	1.49	0	0	0.37	atypical
	DN121791_c0_g1	0	1.19	0	0	0.05	R2R3 MYB
	DN149295_c1_g7	0.07	1.11	0.03	0.05	0.14	R2R3 MYB
	DN146459_c2_g11	0	1.08	0.3	0	0	R2R3 MYB
	DN6351_c0_g1	0.02	0.84	0.18	0.07	0.08	R2R3 MYB
	DN143039_c2_g1	0	0.53	0	0.05	0.15	R2R3 MYB
	DN55106_c0_g1	0	0.45	0.09	0	0.09	R2R3 MYB
	DN109626_c0_g1	0.02	0.29	0.02	0.44	0.02	R2R3 MYB
	DN267156_c0_g1	0	0.25	0.03	0.03	0.1	R2R3 MYB
Flower	DN147056_c0_g2	0	0	1.31	0	0	R2R3 MYB
	DN146459_c2_g4	0	0	0.86	0	0	R2R3 MYB
	DN144924_c2_g8	0	0	0.31	0	0	atypical
	DN144626_c4_g1	0	0	0.3	0	0	4R MYB
	DN144669_c3_g1	0	0.1	7.64	0	0	R2R3 MYB
	DN270454_c0_g1	0	0.02	0.08	0	0	atypical
	DN188294_c0_g1	0	0.09	0.26	0	0	R2R3 MYB
	DN146326_c1_g5	0	0.24	0.59	0	0	R1 MYB
	DN147925_c5_g4	0.06	0.07	13.68	0	0.02	R2R3 MYB
	DN70434_c0_g1	0.13	1.07	4.14	0.53	0	R1 MYB
	DN138619_c0_g2	0.42	1.88	11.73	0.59	0.02	R2R3 MYB
	DN149070_c1_g2	0.15	0.82	4.16	0.14	0	atypical
	DN128191_c0_g1	0.3	1	5.08	0.35	2.27	atypical
	DN147056_c0_g1	1.06	5.64	16.07	5	5.29	R2R3 MYB
	DN58257_c0_g1	0.25	0.72	2.79	0	0	R1 MYB
	DN149746_c2_g7	1.91	3.28	14.76	3.06	1.46	R1 MYB
	DN145829_c0_g2	158.56	240.58	660.65	39.8	3	R2R3 MYB
	DN148161_c1_g2	5.06	7.58	20.61	1.66	0.92	R2R3 MYB
	DN142862_c4_g2	0.41	0.08	1.27	0.03	0	R2R3 MYB
	DN144568_c0_g4	3.27	1.2	8.67	0.1	0.31	R2R3 MYB
	DN142101_c1_g2	11.23	8.39	28.3	4.14	4.56	atypical
Young fruit	DN147056_c0_g3	0	0	0	0.17	0	R2R3 MYB
	DN125895_c0_g1	0	0	0	0.3	0.02	R2R3 MYB
	DN138288_c0_g2	0	0	0.01	0.12	0	R2R3 MYB
	DN134104_c1_g3	0	0.05	0.03	0.53	0.03	R2R3 MYB
	DN144669_c3_g5	0.22	0.75	0.06	6.35	1.06	R2R3 MYB
	DN146443_c1_g4	0.34	1.27	0.49	6.22	0.58	atypical
	DN140431_c0_g1	0	0.15	0.1	0.57	0.1	R2R3 MYB
	DN141656_c0_g1	0.03	1.05	0.99	3.04	0.05	R2R3 MYB
	DN279740_c0_g1	0	0.12	0	0.34	0.06	R1 MYB
	DN146053_c2_g1	0.31	8.04	0.24	22.3	0.36	R2R3 MYB
	DN146463_c1_g1	12.43	15.05	11.06	38.64	17.38	atypical
	DN132443_c0_g1	4.86	12.08	4.08	29.72	9.93	atypical
	DN145308_c4_g2	0	0.11	0	0.24	0	R2R3 MYB
	DN129876_c0_g1	4.24	6.29	2.26	13.25	5.11	atypical
	DN141656_c0_g2	0	0	0	0.44	0	R2R3 MYB
	DN197272_c0_g1	0	0	0	0.36	0	4R MYB
Mature Fruit	DN125764_c0_g1	0	0	0	0	0.54	atypical
	DN133537_c0_g1	0	0	0	0	0.17	atypical
	DN144669_c3_g6	0	0.02	0	0	0.07	R2R3 MYB
	DN145863_c0_g1	1.68	1.05	1.54	0.49	3.63	atypical
	DN147128_c3_g4	0.87	6.4	12.65	5.4	30.65	R1R2R3 MYB
	DN142862_c0_g1	0.47	1.75	0.32	26.44	84.33	R2R3 MYB
	DN145308_c4_g5	0.37	0.37	0.67	0.52	1.56	R2R3 MYB
