# Supplementary material for: Characterization of the Rosa roxburghii Tratt transcriptome and analysis of MYB genes
Source: PLoS One. 2019 Mar 12;14(3):e0203014. doi: 10.1371/journal.pone.0203014 (PMC6414006; doi:10.1371/journal.pone.0203014)
Supplement: S9 Table — (XLSX) [file pone.0203014.s009.xlsx]

## Sheet: Sheet1
SSR type	Number
Total number of sequences examined	63727
Total size of examined sequences (bp)	109644660
Total number of identified SSRs	37545
Number of SSR containing sequences	20321
Number of sequences containing more than 1 SSR	8757
Number of SSRs present in compound formation	5275
